# Supplementary material
Source: PubMed Central journal article supplement (PMC7024011)
Supplement: NIHMS1545797-supplement-1.pdf [file NIHMS1545797-supplement-1.pdf]

# Supplementary information (methods and results) for Vaginal Microbiome Diversity and Preterm Birth: Results of a Nested Case Control Study in Peru

*Freida BLOSTEIN MPH, Bizu GELAYE PhD, Sixto E. SANCHEZ MD, MPH, Michelle A. WILLIAMS PhD, Betsy FOXMAN PhD*

## **Supplementary Methods**

Reads were in a mixed orientation file, therefore the reads were separated into forward and reverse reads using qiime 1's `extract_barcode.py` script. Reads were then demultiplexed using the `idemp` program. After demultiplexing, adapters were trimmed using DADA2's `filterandTrim` commands "trimLeft" option. Runs were thereafter processed using DADA2. After examining quality plots for forward and reverse reads, reads were trimmed at the 240th and 244th nucleotide position respectively, or at the first instance of a quality score  $\leq$  to 11. The following parameters were used for filtering reads: a maximum of 2 expected errors for both forward and reverse reads and no ambiguous bases.

Of a total 8811003 reads, 490020 were lost to filtering and trimming (5.56% lost).

Errors were learned (independently for each run) using 1 million bases. The forward and reverse reads were denoised and then forward and reverse reads were merged together. Post denoising and merging, 8190868 reads remained (1.56% lost).

At this point, the runs were merged together, and chimeras were removed using DADA2s `removeBimeraDe-novo` command and the consensus method. 60.37% of the ASVs were determined to be chimeric; removing chimeras resulted in a loss of 4.85% of reads.

Subsequently taxonomic names were assigned to the genus level using the Silva v132 database. Species names were assigned using DADA2s `addSpecies` command and the Silva v132 database. Although species level assignment is inexact using the 16S rRNA gene, we felt that species level assignment was informative for vaginal communities, where different species within the same genus (i.e. *Lactobacillus*) have different epidemiological significance.

After initial processing using DADA2 the average read count per sample was 56887. A histogram of the read counts in samples is presented in Figure 1.

Technical replicates were examined visually for differences. Overall, the duplicates closely matched each other in terms of the distribution of ASVs' relative abundance, except for one sample which was submitted in triplicate. For this sample, two of three replicates closely matched while the third did not. The triplicate which did not match the other two was therefore excluded from analysis, and the other two replicates kept in. All other replicates were similar to each other and counts from replicates were summed (Figure 2).

After removing the two mock communities and summing the duplicates, 125 samples remained (1 sample per individual in the study). No samples had less than 1000 reads, so all 125 samples were kept for downstream analysis.

Next we filtered out taxa. DADA2 reported an original 1453 ASVs. We removed any taxa that were not bacterial or that were identified as chloroplasts or mitochondria (129 of 1453 ASVs). At this point we collapsed all ASVs named to the same species into a single ASV - if an ASV was not identified to the species level, it remained classified as it's own ASV. This resulted in a loss of 71 ASVs. For the diversity analysis, this was the extent of filtering that we did.

For analyses involving the Dirichlet multinomial modeling and individual taxa testing, we performed two additional filters.

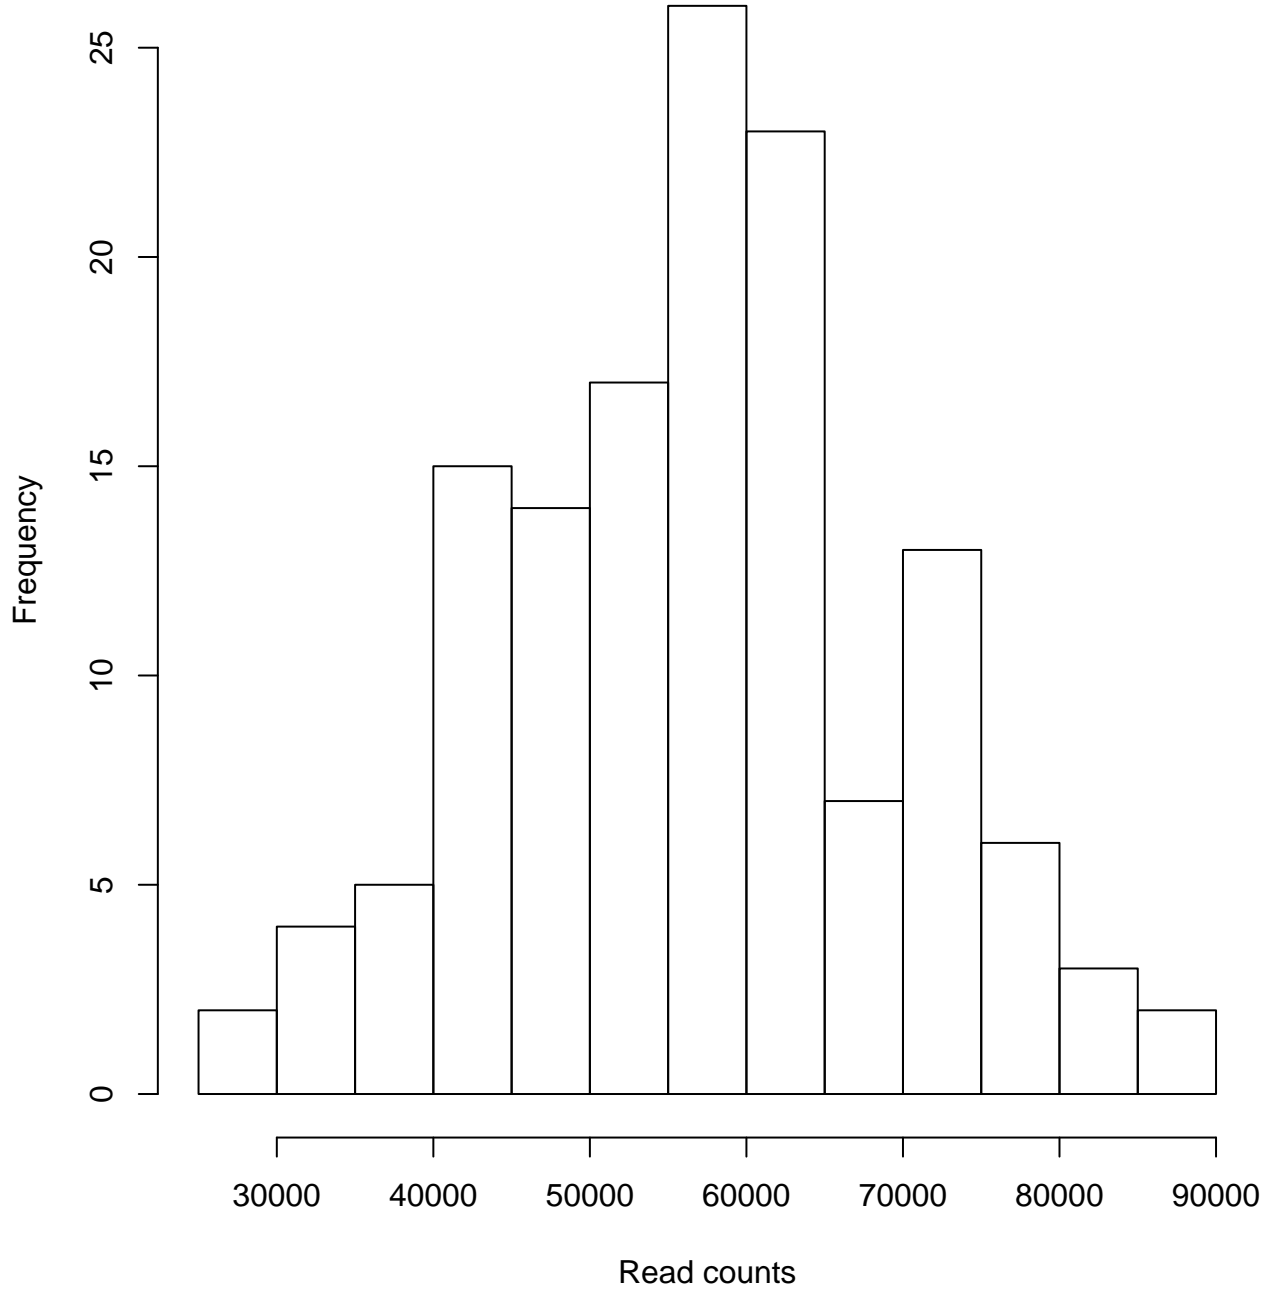

Figure 1: Histogram of read counts in all samples (including mocks and duplicates)

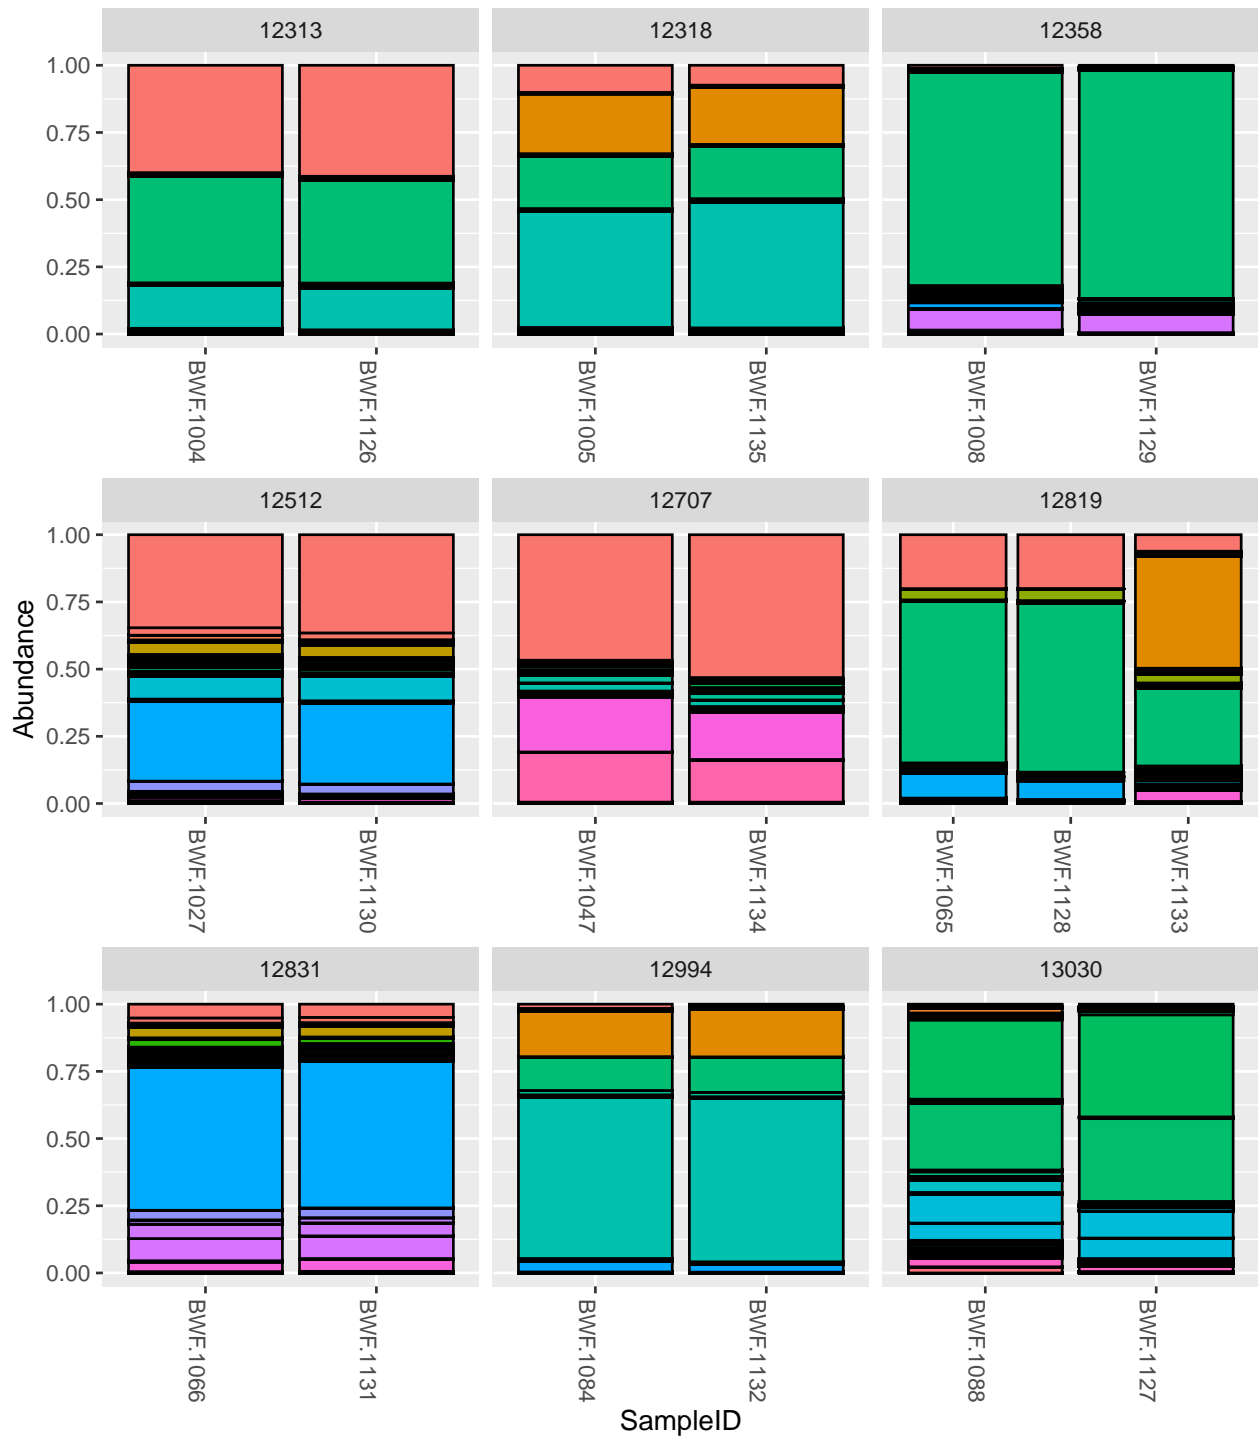

Figure 2: Visual examination of duplicates

We removed phyla that occurred in less than or equal to 1 sample on average. This removed the phyla Acidobacteria, Armatimonadetes, Chloroflexi, Cyanobacteria, Gemmatimonadetes, Planctomycetes, Verrucomicrobia, resulting in a loss of 45 ASVs.

Some studies will filter ASVs that occur in a low percentage of the total samples. However, in our study, some ASVs occurred in a single sample but composed a substantial portion of the reads in that sample. Therefore, we instead filtered ASVs which represented less than 00.5% of the sample's relative abundance in every sample. This resulted in filtering an additional 1007 ASVs, for a total of 201 ASVs for the Dirichlet multinomial modeling and testing of individual taxa in Aldex2.

## Supplementary Results

Supplementary Table 1 compares the sample and swab characteristics by gestational age at vaginal swab. Supplementary Table 2 compares sample and swab characteristics of women who go on to have preterm vs term births, stratified by gestational age at swab (swabbed before 12 weeks gestation vs swabbed at or after 12 weeks gestation, up to 16 weeks gestation).

Table 1: Summary descriptives table by groups of ‘Gestational age at swab’

|                                          | < 12 weeks<br>N=69 | ≥ 12 to 16 weeks<br>N=55 | p.overall |
|------------------------------------------|--------------------|--------------------------|-----------|
| Preterm status:                          |                    |                          | 0.791     |
| No                                       | 54 (78.3%)         | 45 (81.8%)               |           |
| Yes                                      | 15 (21.7%)         | 10 (18.2%)               |           |
| Community state type:                    |                    |                          | 0.221     |
| Diverse                                  | 30 (43.5%)         | 31 (56.4%)               |           |
| <i>Lactobacillus ASV2 dominated*</i>     | 23 (33.3%)         | 11 (20.0%)               |           |
| <i>L. iners dominated</i>                | 16 (23.2%)         | 13 (23.6%)               |           |
| Shannon                                  | 1.22 (0.69)        | 1.40 (0.74)              | 0.160     |
| Maternal age                             | 29.6 (6.22)        | 26.9 (6.39)              | 0.019     |
| Maternal age (categories):               |                    |                          | 0.169     |
| 18 to 19                                 | 2 (2.90%)          | 4 (7.27%)                |           |
| 20 to 29                                 | 34 (49.3%)         | 35 (63.6%)               |           |
| 30 to 34                                 | 17 (24.6%)         | 8 (14.5%)                |           |
| 35 and older                             | 16 (23.2%)         | 8 (14.5%)                |           |
| Education:                               |                    |                          | 0.788     |
| >12th grade                              | 28 (40.6%)         | 25 (45.5%)               |           |
| 7th to 12th grade                        | 37 (53.6%)         | 28 (50.9%)               |           |
| ≤ 6th grade                              | 4 (5.80%)          | 2 (3.64%)                |           |
| Mestizo:                                 |                    |                          | 0.734     |
| No                                       | 18 (26.1%)         | 12 (21.8%)               |           |
| Yes                                      | 51 (73.9%)         | 43 (78.2%)               |           |
| Married:                                 |                    |                          | 0.667     |
| No                                       | 13 (18.8%)         | 13 (23.6%)               |           |
| Yes                                      | 56 (81.2%)         | 42 (76.4%)               |           |
| Employment:                              |                    |                          | 0.747     |
| No                                       | 27 (39.1%)         | 24 (43.6%)               |           |
| Yes                                      | 42 (60.9%)         | 31 (56.4%)               |           |
| Trouble paying for basics:               |                    |                          | 0.377     |
| No                                       | 31 (44.9%)         | 30 (54.5%)               |           |
| Yes                                      | 38 (55.1%)         | 25 (45.5%)               |           |
| gadelivery                               | 38.1 (2.31)        | 38.0 (2.33)              | 0.803     |
| Planned pregnancy:                       |                    |                          | 0.147     |
| No                                       | 32 (47.1%)         | 34 (61.8%)               |           |
| Yes                                      | 36 (52.9%)         | 21 (38.2%)               |           |
| Early pregnancy BMI:                     |                    |                          | 0.202     |
| <18.5                                    | 1 (1.45%)          | 1 (1.82%)                |           |
| 18.5-24.9                                | 27 (39.1%)         | 31 (56.4%)               |           |
| 25-29.9                                  | 24 (34.8%)         | 16 (29.1%)               |           |
| ≥ 30                                     | 16 (23.2%)         | 6 (10.9%)                |           |
| Missing                                  | 1 (1.45%)          | 1 (1.82%)                |           |
| Nulliparous:                             |                    |                          | 0.212     |
| No                                       | 36 (52.9%)         | 22 (40.0%)               |           |
| Yes                                      | 32 (47.1%)         | 33 (60.0%)               |           |
| Bacterial vaginosis (Hay-Ison criteria): |                    |                          | 0.660     |
| I                                        | 10 (14.5%)         | 10 (18.2%)               |           |
| Missing                                  | 2 (2.90%)          | 1 (1.82%)                |           |
| N                                        | 42 (60.9%)         | 28 (50.9%)               |           |
| VB                                       | 15 (21.7%)         | 16 (29.1%)               |           |

\* The second CST’s dominating organism – labeled ASV2 - was identified either *L. acidophilus* or *L. crispatus* by a BLAST search.

Table 2: Summary descriptive tables by preterm birth stratified by gestational age

|                                      | < 12 weeks  |             | p.overall | ≥ 12 to 16 weeks |             | p.overall |
|--------------------------------------|-------------|-------------|-----------|------------------|-------------|-----------|
|                                      | No<br>N=54  | Yes<br>N=15 |           | No<br>N=45       | Yes<br>N=10 |           |
| Community state type:                |             |             | 0.365     |                  |             | 0.094     |
| Diverse                              | 21 (38.9%)  | 9 (60.0%)   |           | 28 (62.2%)       | 3 (30.0%)   |           |
| <i>Lactobacillus ASV2 dominated*</i> | 19 (35.2%)  | 4 (26.7%)   |           | 7 (15.6%)        | 4 (40.0%)   |           |
| <i>L. iners dominated</i>            | 14 (25.9%)  | 2 (13.3%)   |           | 10 (22.2%)       | 3 (30.0%)   |           |
| Gestational age at swab:             |             |             |           |                  |             |           |
| < 12 weeks                           | 54 (100%)   | 15 (100%)   |           | 0 (0.00%)        | 0 (0.00%)   |           |
| ≥ 12 to 16 weeks                     | 0 (0.00%)   | 0 (0.00%)   |           | 45 (100%)        | 10 (100%)   |           |
| Shannon                              | 1.20 (0.69) | 1.28 (0.73) | 0.707     | 1.49 (0.72)      | 1.01 (0.72) | 0.076     |
| Maternal age                         | 29.4 (5.87) | 30.3 (7.55) | 0.653     | 26.2 (6.03)      | 29.8 (7.50) | 0.184     |
| Maternal age (categories):           |             |             | 0.583     |                  |             | 0.687     |
| 18 to 19                             | 1 (1.85%)   | 1 (6.67%)   |           | 4 (8.89%)        | 0 (0.00%)   |           |
| 20 to 29                             | 28 (51.9%)  | 6 (40.0%)   |           | 29 (64.4%)       | 6 (60.0%)   |           |
| 30 to 34                             | 13 (24.1%)  | 4 (26.7%)   |           | 6 (13.3%)        | 2 (20.0%)   |           |
| 35 and older                         | 12 (22.2%)  | 4 (26.7%)   |           | 6 (13.3%)        | 2 (20.0%)   |           |
| Education:                           |             |             | 0.562     |                  |             | 0.018     |
| >12th grade                          | 23 (42.6%)  | 5 (33.3%)   |           | 24 (53.3%)       | 1 (10.0%)   |           |
| 7th to 12th grade                    | 27 (50.0%)  | 10 (66.7%)  |           | 20 (44.4%)       | 8 (80.0%)   |           |
| ≤ 6th grade                          | 4 (7.41%)   | 0 (0.00%)   |           | 1 (2.22%)        | 1 (10.0%)   |           |
| Mestizo:                             |             |             | 1.000     |                  |             | 0.096     |
| No                                   | 14 (25.9%)  | 4 (26.7%)   |           | 12 (26.7%)       | 0 (0.00%)   |           |
| Yes                                  | 40 (74.1%)  | 11 (73.3%)  |           | 33 (73.3%)       | 10 (100%)   |           |
| Married:                             |             |             | 0.270     |                  |             | 1.000     |
| No                                   | 12 (22.2%)  | 1 (6.67%)   |           | 11 (24.4%)       | 2 (20.0%)   |           |
| Yes                                  | 42 (77.8%)  | 14 (93.3%)  |           | 34 (75.6%)       | 8 (80.0%)   |           |
| Employment:                          |             |             | 0.330     |                  |             | 0.486     |
| No                                   | 19 (35.2%)  | 8 (53.3%)   |           | 21 (46.7%)       | 3 (30.0%)   |           |
| Yes                                  | 35 (64.8%)  | 7 (46.7%)   |           | 24 (53.3%)       | 7 (70.0%)   |           |
| Trouble paying for basics:           |             |             | 0.655     |                  |             | 0.158     |
| No                                   | 23 (42.6%)  | 8 (53.3%)   |           | 27 (60.0%)       | 3 (30.0%)   |           |
| Yes                                  | 31 (57.4%)  | 7 (46.7%)   |           | 18 (40.0%)       | 7 (70.0%)   |           |
| Planned pregnancy:                   |             |             | 0.398     |                  |             | 0.725     |
| No                                   | 23 (43.4%)  | 9 (60.0%)   |           | 27 (60.0%)       | 7 (70.0%)   |           |
| Yes                                  | 30 (56.6%)  | 6 (40.0%)   |           | 18 (40.0%)       | 3 (30.0%)   |           |
| Early pregnancy BMI:                 |             |             | 0.320     |                  |             | 0.066     |
| <18.5                                | 0 (0.00%)   | 1 (6.67%)   |           | 0 (0.00%)        | 1 (10.0%)   |           |
| 18.5-24.9                            | 22 (40.7%)  | 5 (33.3%)   |           | 25 (55.6%)       | 6 (60.0%)   |           |
| 25-29.9                              | 20 (37.0%)  | 4 (26.7%)   |           | 14 (31.1%)       | 2 (20.0%)   |           |
| ≥ 30                                 | 11 (20.4%)  | 5 (33.3%)   |           | 6 (13.3%)        | 0 (0.00%)   |           |
| Missing                              | 1 (1.85%)   | 0 (0.00%)   |           | 0 (0.00%)        | 1 (10.0%)   |           |
| Nulliparous:                         |             |             | 0.796     |                  |             | 0.498     |
| No                                   | 29 (54.7%)  | 7 (46.7%)   |           | 17 (37.8%)       | 5 (50.0%)   |           |
| Yes                                  | 24 (45.3%)  | 8 (53.3%)   |           | 28 (62.2%)       | 5 (50.0%)   |           |
| Bacterial vaginosis (Hay-Ison):      |             |             | 0.421     |                  |             | 1.000     |
| I                                    | 6 (11.1%)   | 4 (26.7%)   |           | 8 (17.8%)        | 2 (20.0%)   |           |
| Missing                              | 2 (3.70%)   | 0 (0.00%)   |           | 1 (2.22%)        | 0 (0.00%)   |           |
| N                                    | 33 (61.1%)  | 9 (60.0%)   |           | 23 (51.1%)       | 5 (50.0%)   |           |
| VB                                   | 13 (24.1%)  | 2 (13.3%)   |           | 13 (28.9%)       | 3 (30.0%)   |           |

\* The second CST's dominating organism (labeled ASV2) was identified as either *L. acidophilus* or *L. crispatus* by a BLAST search

Figure 3 displays the same information as in Figure 1 of the main results section limited to only Mestizo women to examine the possibility that the observed differences in mean Shannon diversity by term status in those sampled at or after 12 weeks' gestation is due to the uneven distribution of ethnicities in the samples collected at or after 12 weeks' gestation. The same pattern holds when restricted to Mestizo participants only (i.e. lower Shannon diversity among women with preterm births than term births among those sampled at or after 12 week's gestation. )

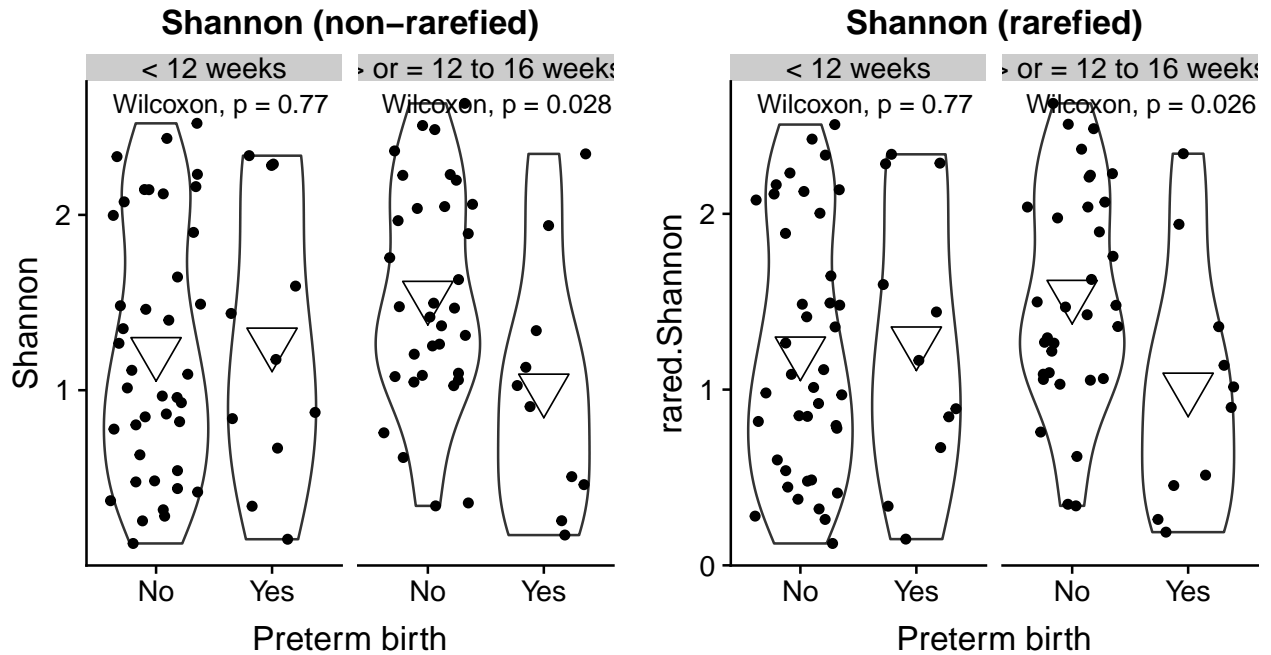

Figure 3: Alpha diversity violins by preterm birth status and trimester of sampling limited to only Mestizo women in a sample of Peruvian women (N=95)

Figure 4 displays the results of running an NMDS ordination on the Bray-curtis distances, colored by various characteristics of interest (i.e., preterm birth status and community state type).

Figure 5 and 6 compare Shannon diversity measures in Mestizo vs non-Mestizo and parous vs nulliparous women, respectively. Interesting, nulliparous women appear to be more diverse than parous women. Tables 3 and 4 examine sample and swab characteristics by community state type assignment, respectively when not stratified and when stratified by gestational age. BV result always correlates strongly with vaginal community state type assignment.

Table 3: Summary descriptives table by groups of ‘Community state type’

|                            | Diverse<br>N=62 | <i>Lactobacillus ASV2 dominated</i><br>N=34 | <i>L. iners dominated</i><br>N=29 | p-value |
|----------------------------|-----------------|---------------------------------------------|-----------------------------------|---------|
| Preterm status:            |                 |                                             |                                   | 0.811   |
| No                         | 50 (80.6%)      | 26 (76.5%)                                  | 24 (82.8%)                        |         |
| Yes                        | 12 (19.4%)      | 8 (23.5%)                                   | 5 (17.2%)                         |         |
| Maternal age               | 28.0 (6.76)     | 29.2 (6.08)                                 | 27.9 (6.30)                       | 0.633   |
| Maternal age (categories): |                 |                                             |                                   | 0.524   |
| 18 to 19                   | 4 (6.45%)       | 0 (0.00%)                                   | 3 (10.3%)                         |         |
| 20 to 29                   | 36 (58.1%)      | 18 (52.9%)                                  | 15 (51.7%)                        |         |
| 30 to 34                   | 10 (16.1%)      | 8 (23.5%)                                   | 7 (24.1%)                         |         |
| 35 and older               | 12 (19.4%)      | 8 (23.5%)                                   | 4 (13.8%)                         |         |
| Education:                 |                 |                                             |                                   | 0.748   |
| >12th grade                | 29 (46.8%)      | 12 (35.3%)                                  | 12 (41.4%)                        |         |
| 7th to 12th grade          | 30 (48.4%)      | 21 (61.8%)                                  | 15 (51.7%)                        |         |
| ≤ 6th grade                | 3 (4.84%)       | 1 (2.94%)                                   | 2 (6.90%)                         |         |
| Mestizo:                   |                 |                                             |                                   | 0.871   |
| No                         | 14 (22.6%)      | 8 (23.5%)                                   | 8 (27.6%)                         |         |
| Yes                        | 48 (77.4%)      | 26 (76.5%)                                  | 21 (72.4%)                        |         |
| Married:                   |                 |                                             |                                   | 0.818   |
| No                         | 13 (21.0%)      | 6 (17.6%)                                   | 7 (24.1%)                         |         |
| Yes                        | 49 (79.0%)      | 28 (82.4%)                                  | 22 (75.9%)                        |         |

Table 3: Summary descriptives table by groups of ‘Community state type’  
(continued)

|                                          | <i>Diverse</i> | <i>Lactobacillus ASV2 dominated*</i> | <i>L. iners dominated</i> | <i>p-value</i> |
|------------------------------------------|----------------|--------------------------------------|---------------------------|----------------|
| Employment:                              |                |                                      |                           | 0.196          |
| No                                       | 30 (48.4%)     | 10 (29.4%)                           | 12 (41.4%)                |                |
| Yes                                      | 32 (51.6%)     | 24 (70.6%)                           | 17 (58.6%)                |                |
| Trouble paying for basics:               |                |                                      |                           | 0.384          |
| No                                       | 30 (48.4%)     | 14 (41.2%)                           | 17 (58.6%)                |                |
| Yes                                      | 32 (51.6%)     | 20 (58.8%)                           | 12 (41.4%)                |                |
| Planned pregnancy:                       |                |                                      |                           | 0.658          |
| No                                       | 34 (55.7%)     | 16 (47.1%)                           | 16 (57.1%)                |                |
| Yes                                      | 27 (44.3%)     | 18 (52.9%)                           | 12 (42.9%)                |                |
| Early pregnancy BMI:                     |                |                                      |                           | 0.723          |
| <18.5                                    | 1 (1.61%)      | 0 (0.00%)                            | 1 (3.45%)                 |                |
| 18.5-24.9                                | 30 (48.4%)     | 14 (41.2%)                           | 14 (48.3%)                |                |
| 25-29.9                                  | 20 (32.3%)     | 12 (35.3%)                           | 9 (31.0%)                 |                |
| ≥ 30                                     | 11 (17.7%)     | 6 (17.6%)                            | 5 (17.2%)                 |                |
| Missing                                  | 0 (0.00%)      | 2 (5.88%)                            | 0 (0.00%)                 |                |
| Nulliparous:                             |                |                                      |                           | 0.107          |
| No                                       | 24 (39.3%)     | 21 (61.8%)                           | 13 (44.8%)                |                |
| Yes                                      | 37 (60.7%)     | 13 (38.2%)                           | 16 (55.2%)                |                |
| Bacterial vaginosis (Hay-Ison criteria): |                |                                      |                           | <0.001         |
| I                                        | 14 (22.6%)     | 1 (2.94%)                            | 6 (20.7%)                 |                |
| Missing                                  | 1 (1.61%)      | 1 (2.94%)                            | 1 (3.45%)                 |                |
| N                                        | 18 (29.0%)     | 31 (91.2%)                           | 21 (72.4%)                |                |
| VB                                       | 29 (46.8%)     | 1 (2.94%)                            | 1 (3.45%)                 |                |

\* The second CST’s dominating organism (labeled ASV2) was identified as either *L. acidophilus* or *L. crispatus* by a BLAST search



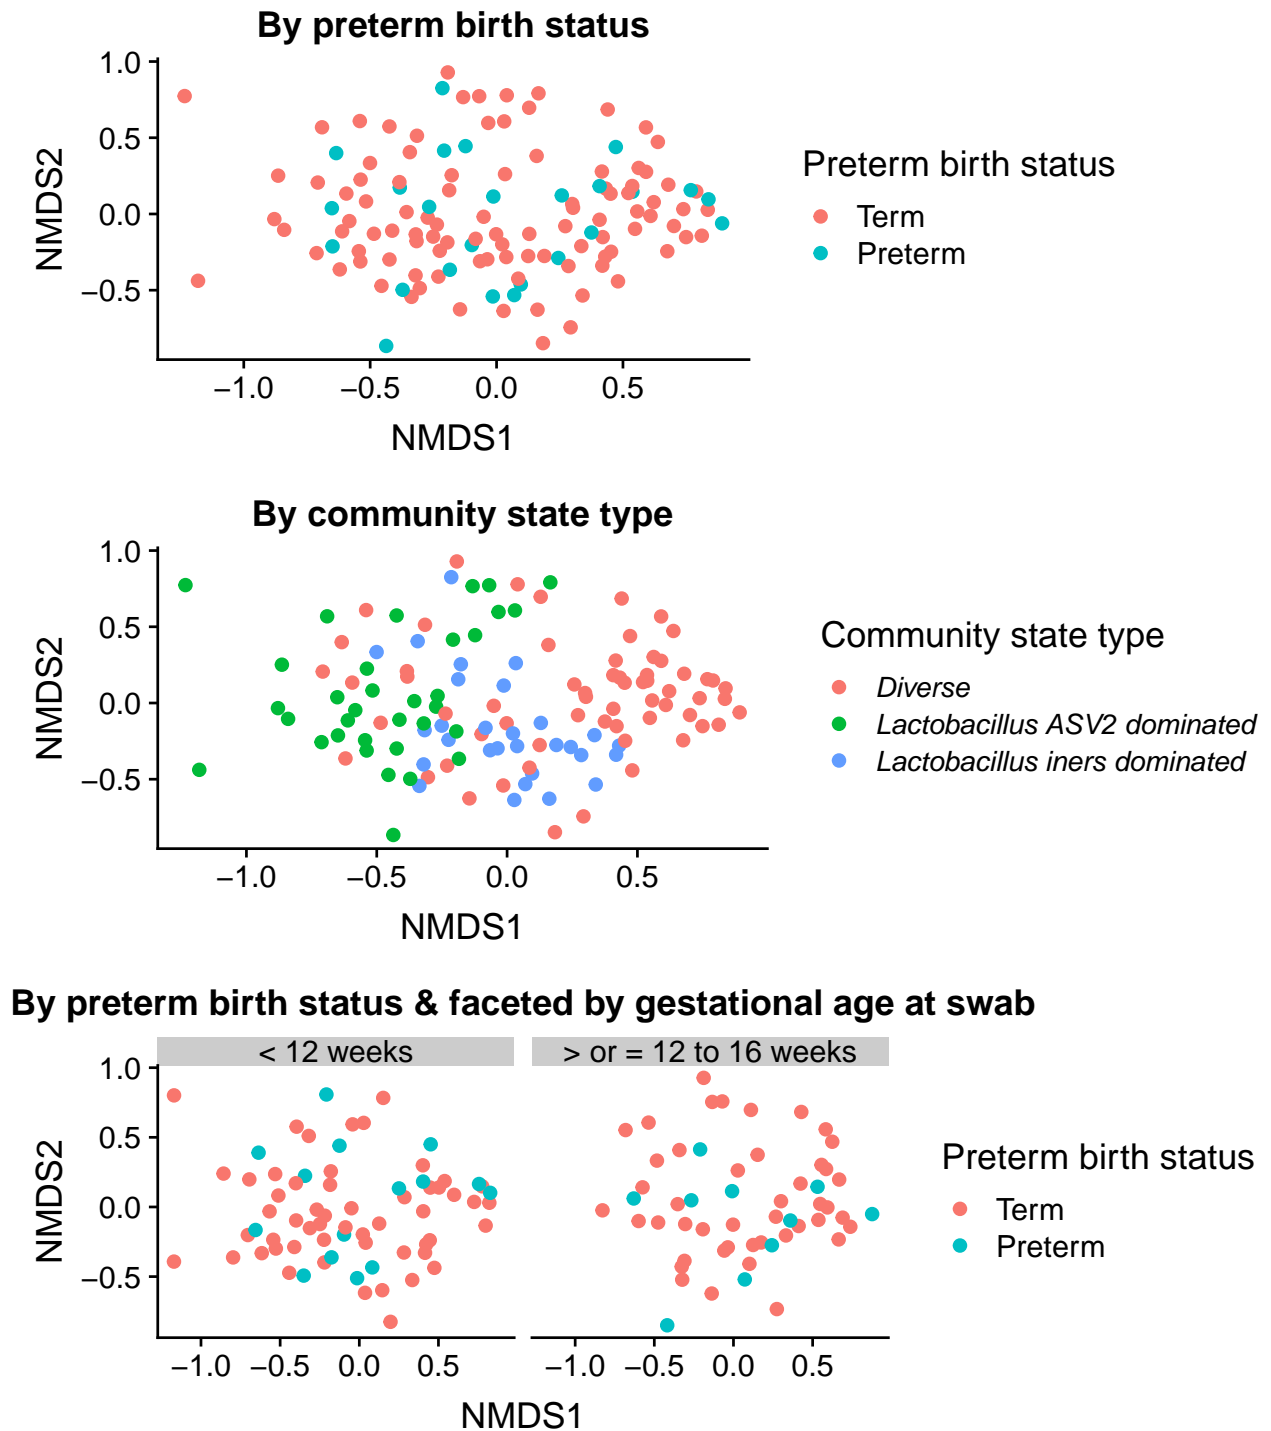

Figure 4: Bray-curtis distance based ordination plots (NMDS)

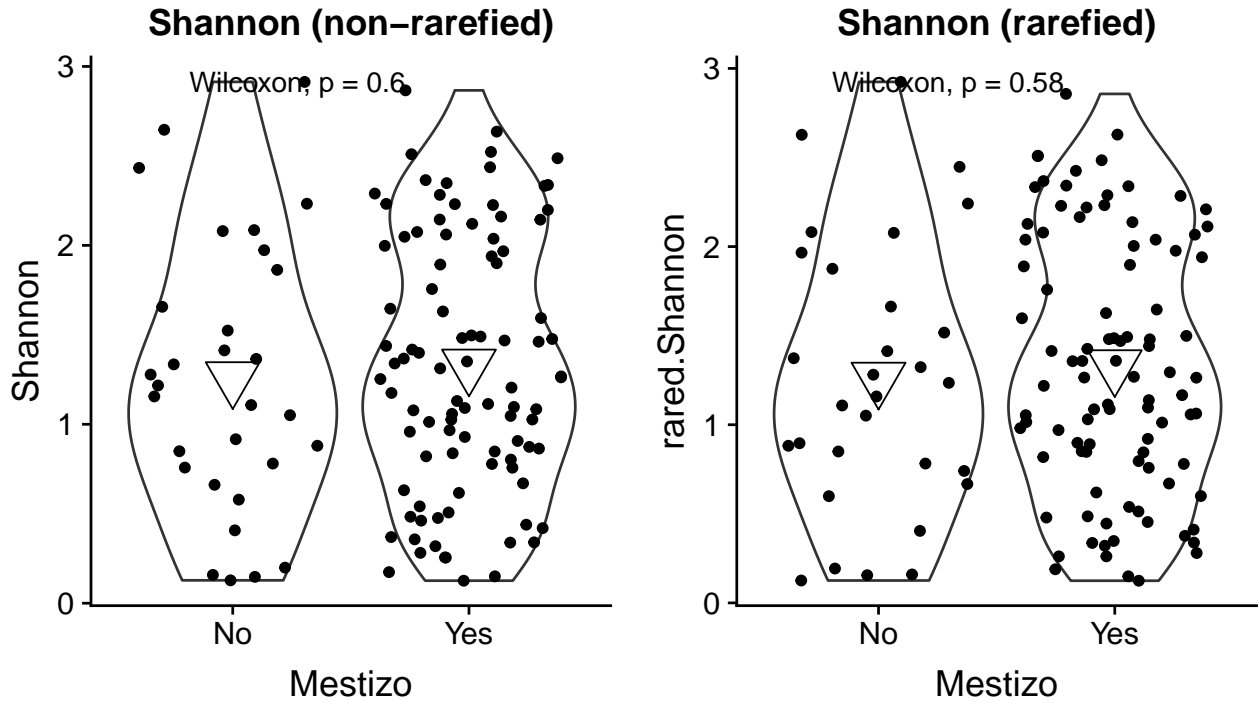

Figure 5: Shannon by Mestizo status

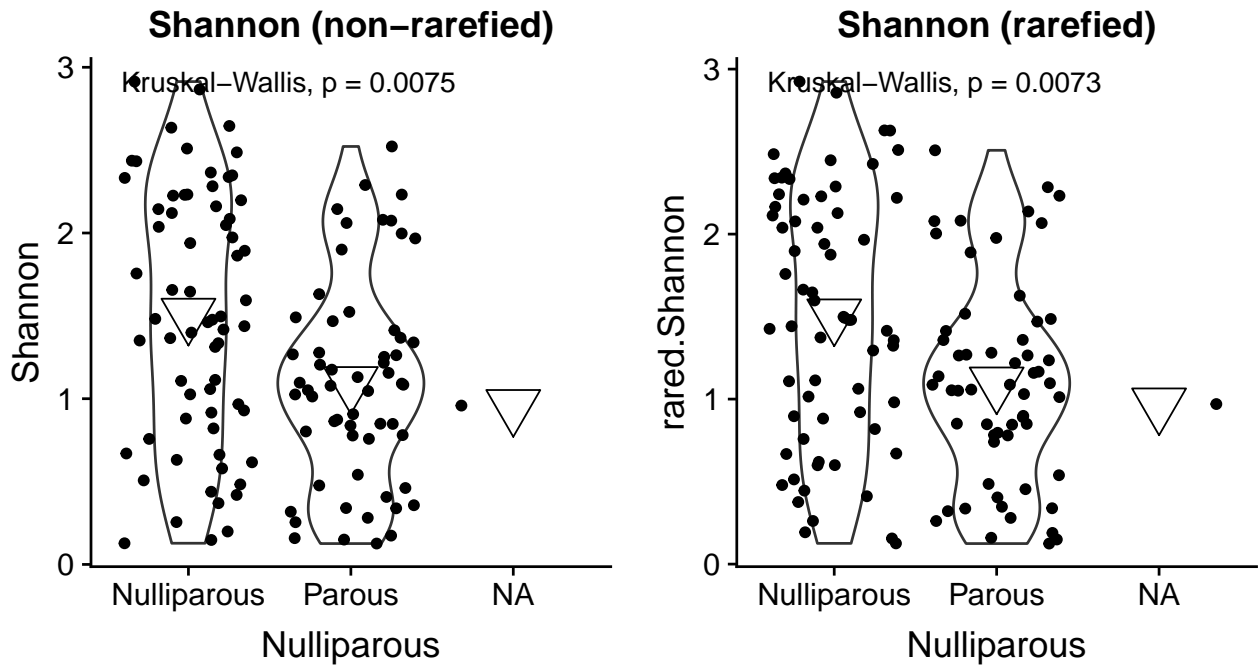

One individual missing information on parity

Figure 6: Shannon by Nulliparity

Table 4: Summary descriptive tables by Community state type stratified by gestational age

|                                          | < 12 weeks      |                                              |                                   |                | ≥ 12 to 16 weeks |                                             |                                   |                |
|------------------------------------------|-----------------|----------------------------------------------|-----------------------------------|----------------|------------------|---------------------------------------------|-----------------------------------|----------------|
|                                          | Diverse<br>N=30 | <i>Lactobacillus ASV2 dominated*</i><br>N=23 | <i>L. iners dominated</i><br>N=16 | <i>p-value</i> | Diverse<br>N=31  | <i>Lactobacillus ASV2 dominated</i><br>N=11 | <i>L. iners dominated</i><br>N=13 | <i>p-value</i> |
| Preterm status:                          |                 |                                              |                                   | 0.365          |                  |                                             |                                   | 0.094          |
| No                                       | 21 (70.0%)      | 19 (82.6%)                                   | 14 (87.5%)                        |                | 28 (90.3%)       | 7 (63.6%)                                   | 10 (76.9%)                        |                |
| Yes                                      | 9 (30.0%)       | 4 (17.4%)                                    | 2 (12.5%)                         |                | 3 (9.68%)        | 4 (36.4%)                                   | 3 (23.1%)                         |                |
| Maternal age                             | 29.8 (7.13)     | 29.8 (5.77)                                  | 28.8 (5.26)                       | 0.835          | 26.5 (5.95)      | 27.9 (6.79)                                 | 26.8 (7.46)                       | 0.835          |
| Maternal age (categories):               |                 |                                              |                                   | 0.834          |                  |                                             |                                   | 0.880          |
| 18 to 19                                 | 1 (3.33%)       | 0 (0.00%)                                    | 1 (6.25%)                         |                | 2 (6.45%)        | 0 (0.00%)                                   | 2 (15.4%)                         |                |
| 20 to 29                                 | 15 (50.0%)      | 11 (47.8%)                                   | 8 (50.0%)                         |                | 21 (67.7%)       | 7 (63.6%)                                   | 7 (53.8%)                         |                |
| 30 to 34                                 | 6 (20.0%)       | 6 (26.1%)                                    | 5 (31.2%)                         |                | 4 (12.9%)        | 2 (18.2%)                                   | 2 (15.4%)                         |                |
| 35 and older                             | 8 (26.7%)       | 6 (26.1%)                                    | 2 (12.5%)                         |                | 4 (12.9%)        | 2 (18.2%)                                   | 2 (15.4%)                         |                |
| Education:                               |                 |                                              |                                   | 0.964          |                  |                                             |                                   | 0.701          |
| >12th grade                              | 13 (43.3%)      | 8 (34.8%)                                    | 7 (43.8%)                         |                | 16 (51.6%)       | 4 (36.4%)                                   | 5 (38.5%)                         |                |
| 7th to 12th grade                        | 15 (50.0%)      | 14 (60.9%)                                   | 8 (50.0%)                         |                | 14 (45.2%)       | 7 (63.6%)                                   | 7 (53.8%)                         |                |
| ≤ 6th grade                              | 2 (6.67%)       | 1 (4.35%)                                    | 1 (6.25%)                         |                | 1 (3.23%)        | 0 (0.00%)                                   | 1 (7.69%)                         |                |
| Mestizo:                                 |                 |                                              |                                   | 0.938          |                  |                                             |                                   | 0.550          |
| No                                       | 7 (23.3%)       | 7 (30.4%)                                    | 4 (25.0%)                         |                | 7 (22.6%)        | 1 (9.09%)                                   | 4 (30.8%)                         |                |
| Yes                                      | 23 (76.7%)      | 16 (69.6%)                                   | 12 (75.0%)                        |                | 24 (77.4%)       | 10 (90.9%)                                  | 9 (69.2%)                         |                |
| Married:                                 |                 |                                              |                                   | 0.625          |                  |                                             |                                   | 1.000          |
| No                                       | 6 (20.0%)       | 3 (13.0%)                                    | 4 (25.0%)                         |                | 7 (22.6%)        | 3 (27.3%)                                   | 3 (23.1%)                         |                |
| Yes                                      | 24 (80.0%)      | 20 (87.0%)                                   | 12 (75.0%)                        |                | 24 (77.4%)       | 8 (72.7%)                                   | 10 (76.9%)                        |                |
| Employment:                              |                 |                                              |                                   | 0.481          |                  |                                             |                                   | 0.498          |
| No                                       | 14 (46.7%)      | 7 (30.4%)                                    | 6 (37.5%)                         |                | 15 (48.4%)       | 3 (27.3%)                                   | 6 (46.2%)                         |                |
| Yes                                      | 16 (53.3%)      | 16 (69.6%)                                   | 10 (62.5%)                        |                | 16 (51.6%)       | 8 (72.7%)                                   | 7 (53.8%)                         |                |
| Trouble paying for basics:               |                 |                                              |                                   | 0.225          |                  |                                             |                                   | 0.998          |
| No                                       | 13 (43.3%)      | 8 (34.8%)                                    | 10 (62.5%)                        |                | 17 (54.8%)       | 6 (54.5%)                                   | 7 (53.8%)                         |                |
| Yes                                      | 17 (56.7%)      | 15 (65.2%)                                   | 6 (37.5%)                         |                | 14 (45.2%)       | 5 (45.5%)                                   | 6 (46.2%)                         |                |
| Planned pregnancy:                       |                 |                                              |                                   | 0.200          |                  |                                             |                                   | 0.013          |
| No                                       | 16 (53.3%)      | 12 (52.2%)                                   | 4 (26.7%)                         |                | 18 (58.1%)       | 4 (36.4%)                                   | 12 (92.3%)                        |                |
| Yes                                      | 14 (46.7%)      | 11 (47.8%)                                   | 11 (73.3%)                        |                | 13 (41.9%)       | 7 (63.6%)                                   | 1 (7.69%)                         |                |
| Early pregnancy BMI:                     |                 |                                              |                                   | 0.862          |                  |                                             |                                   | 0.124          |
| <18.5                                    | 1 (3.33%)       | 0 (0.00%)                                    | 0 (0.00%)                         |                | 0 (0.00%)        | 0 (0.00%)                                   | 1 (7.69%)                         |                |
| 18.5-24.9                                | 11 (36.7%)      | 11 (47.8%)                                   | 5 (31.2%)                         |                | 19 (61.3%)       | 3 (27.3%)                                   | 9 (69.2%)                         |                |
| 25-29.9                                  | 10 (33.3%)      | 7 (30.4%)                                    | 7 (43.8%)                         |                | 9 (29.0%)        | 5 (45.5%)                                   | 2 (15.4%)                         |                |
| ≥ 30                                     | 8 (26.7%)       | 4 (17.4%)                                    | 4 (25.0%)                         |                | 3 (9.68%)        | 2 (18.2%)                                   | 1 (7.69%)                         |                |
| Missing                                  | 0 (0.00%)       | 1 (4.35%)                                    | 0 (0.00%)                         |                | 0 (0.00%)        | 1 (9.09%)                                   | 0 (0.00%)                         |                |
| Nulliparous:                             |                 |                                              |                                   | 0.335          |                  |                                             |                                   | 0.397          |
| No                                       | 14 (48.3%)      | 15 (65.2%)                                   | 7 (43.8%)                         |                | 10 (32.3%)       | 6 (54.5%)                                   | 6 (46.2%)                         |                |
| Yes                                      | 15 (51.7%)      | 8 (34.8%)                                    | 9 (56.2%)                         |                | 21 (67.7%)       | 5 (45.5%)                                   | 7 (53.8%)                         |                |
| Bacterial vaginosis (Hay-Ison criteria): |                 |                                              |                                   | <0.001         |                  |                                             |                                   | 0.003          |
| I                                        | 6 (20.0%)       | 1 (4.35%)                                    | 3 (18.8%)                         |                | 7 (22.6%)        | 0 (0.00%)                                   | 3 (23.1%)                         |                |
| Missing                                  | 0 (0.00%)       | 1 (4.35%)                                    | 1 (6.25%)                         |                | 1 (3.23%)        | 0 (0.00%)                                   | 0 (0.00%)                         |                |
| N                                        | 9 (30.0%)       | 21 (91.3%)                                   | 12 (75.0%)                        |                | 9 (29.0%)        | 10 (90.9%)                                  | 9 (69.2%)                         |                |
| VB                                       | 15 (50.0%)      | 0 (0.00%)                                    | 0 (0.00%)                         |                | 14 (45.2%)       | 1 (9.09%)                                   | 1 (7.69%)                         |                |

\*

The second CST's dominating organism (labeled ASV2) identified as either *L. acidophilus* or *L. crispatus* by a BLAST search

Table 5: Results of logistic regression for preterm birth status (odds ratios and 95 percent CI) in a sample of Peruvian women - sensitivity analysis: additional parameter for dispersion

|                                     | Model 1 <sup>a</sup>    | Model 2 <sup>b</sup>   | Model 3 <sup>c</sup>   |
|-------------------------------------|-------------------------|------------------------|------------------------|
|                                     | OR (CI) <sup>d</sup>    | OR (CI) <sup>d</sup>   | OR (CI) <sup>d</sup>   |
|                                     | 100 controls / 25 cases | 99 controls / 25 cases | 99 controls / 25 cases |
| <i>Lactobacillus ASV2 dominated</i> | 1.28 (0.45, 3.54)       | 1.25 (0.42, 3.55)      | 1.27 (0.43, 3.63)      |
| <i>L. iners dominated</i>           | 0.87 (0.25, 2.67)       | 0.85 (0.24, 2.63)      | 0.87 (0.25, 2.73)      |

Note:

Reference is Diverse community state type.

One individual missing parity status

<sup>a</sup> Unadjusted

<sup>b</sup> Adjusted for parity

<sup>c</sup> Adjusted for parity and Mestizo

<sup>d</sup> Profile-likelihood calculated confidence intervals

<sup>e</sup> The second CST's dominating organism - labeled ASV2 - was identified as being either *L. acidophilus* or *L. crispatus* by a BLAST search.

Table 6: Results of logistic regression for preterm birth status stratified by gestational age at vaginal swab (odds ratios and 95 percent CI) in a sample of Peruvian women - sensitivity analysis: additional parameter for dispersion

|                                                                           | < 12 weeks             |                        |                        | > or = 12 weeks        |                        |                        |
|---------------------------------------------------------------------------|------------------------|------------------------|------------------------|------------------------|------------------------|------------------------|
|                                                                           | Model 1 <sup>a</sup>   | Model 2 <sup>b</sup>   | Model 3 <sup>c</sup>   | Model 1 <sup>a</sup>   | Model 2 <sup>b</sup>   | Model 3 <sup>c</sup>   |
|                                                                           | OR (CI) <sup>e</sup>   |
|                                                                           | 54 controls / 15 cases | 53 controls / 15 cases | 53 controls / 15 cases | 45 controls / 10 cases | 45 controls / 10 cases | 45 controls / 10 cases |
| <i>Lactobacillus ASV2 dominated<sup>e</sup> (reference = Diverse CST)</i> | 0.49 (0.11, 1.83)      | 0.49 (0.11, 1.91)      | 0.49 (0.11, 1.92)      | 5.33 (0.92, 34.84)     | 5.06 (0.83, 34.75)     | 4.65 (0.92, 25.93)     |
| <i>L. iners dominated</i>                                                 | 0.33 (0.04, 1.59)      | 0.31 (0.04, 1.53)      | 0.31 (0.04, 1.54)      | 2.8 (0.43, 18.47)      | 2.71 (0.4, 18.52)      | 3.48 (0.6, 20.65)      |

Note:

Reference is Diverse community state type

<sup>a</sup> Unadjusted

<sup>b</sup> Adjusted for parity, one individual missing parity information

<sup>c</sup> Adjusted for parity and Mestizo, one individual missing parity information

<sup>d</sup> Profile-likelihood calculated confidence intervals

<sup>e</sup> The second CST's dominating organism - labeled ASV2 - was identified as being either *L. acidophilus* or *L. crispatus* by a BLAST search.

## Results of multivariate model sensitivity analyses

We include a sensitivity analysis modeling an additional parameter for dispersion; however, as the data is not significantly overdispersed, the estimates from these models are very similar to those in the main analysis (Supplemental Tables 5 & 6)

As there were no non-Mestizo cases sampled at or after 12 weeks of gestation, the “Mestizo” predictor perfectly delineates cases and controls among women sampled at or after 12 weeks of gestation. Therefore, when numerically estimating confidence intervals for the Mestizo coefficient, fitted probabilities of 0 and 1 occurred, and our confidence intervals and effect estimates may not be reliable. However, when limiting the stratified sample to only Mestizo women, results of the models were similar to those controlling for Mestizo and parity and those controlling for parity alone (see Supplemental Table 7 and 8).

We also performed an effect modification analysis. In Table 9, we present the results of the multiplicative effect modification analysis performed by including an interaction term between bacterial community state type and gestational age at sampling. Due to our 3-level predictor (community state type), we had to run regressions on data subsets excluding individuals in one of the three community state types at a time in order to obtain relative excess risk due to interaction (RERI) statistics for an analysis of effect modification on the additive scale. Additionally, because measures of additive interaction can be inconsistent when using preventative factors, we have recoded the reference for the microbiome CSTs when calculating the RERI such that one of the *Lactobacillus* dominated community state types is always the reference. These results are presented in Tables 10 and 11.

We also conducted a taxa-wide assessment of association with preterm birth, both stratified and not stratified by gestational age. No taxa were significantly associated with preterm birth in stratified or unstratified analyses after correction for multiple testing. We show the two dominant *Lactobacillus* species and *Gardnerella vaginalis* here, although they were not significant, in Figure 8. Before correction for multiple testing, no taxa were significantly different between preterm and term births in the unstratified analysis, and two taxa were significant in the first trimester - these taxa are shown in Figure 9.

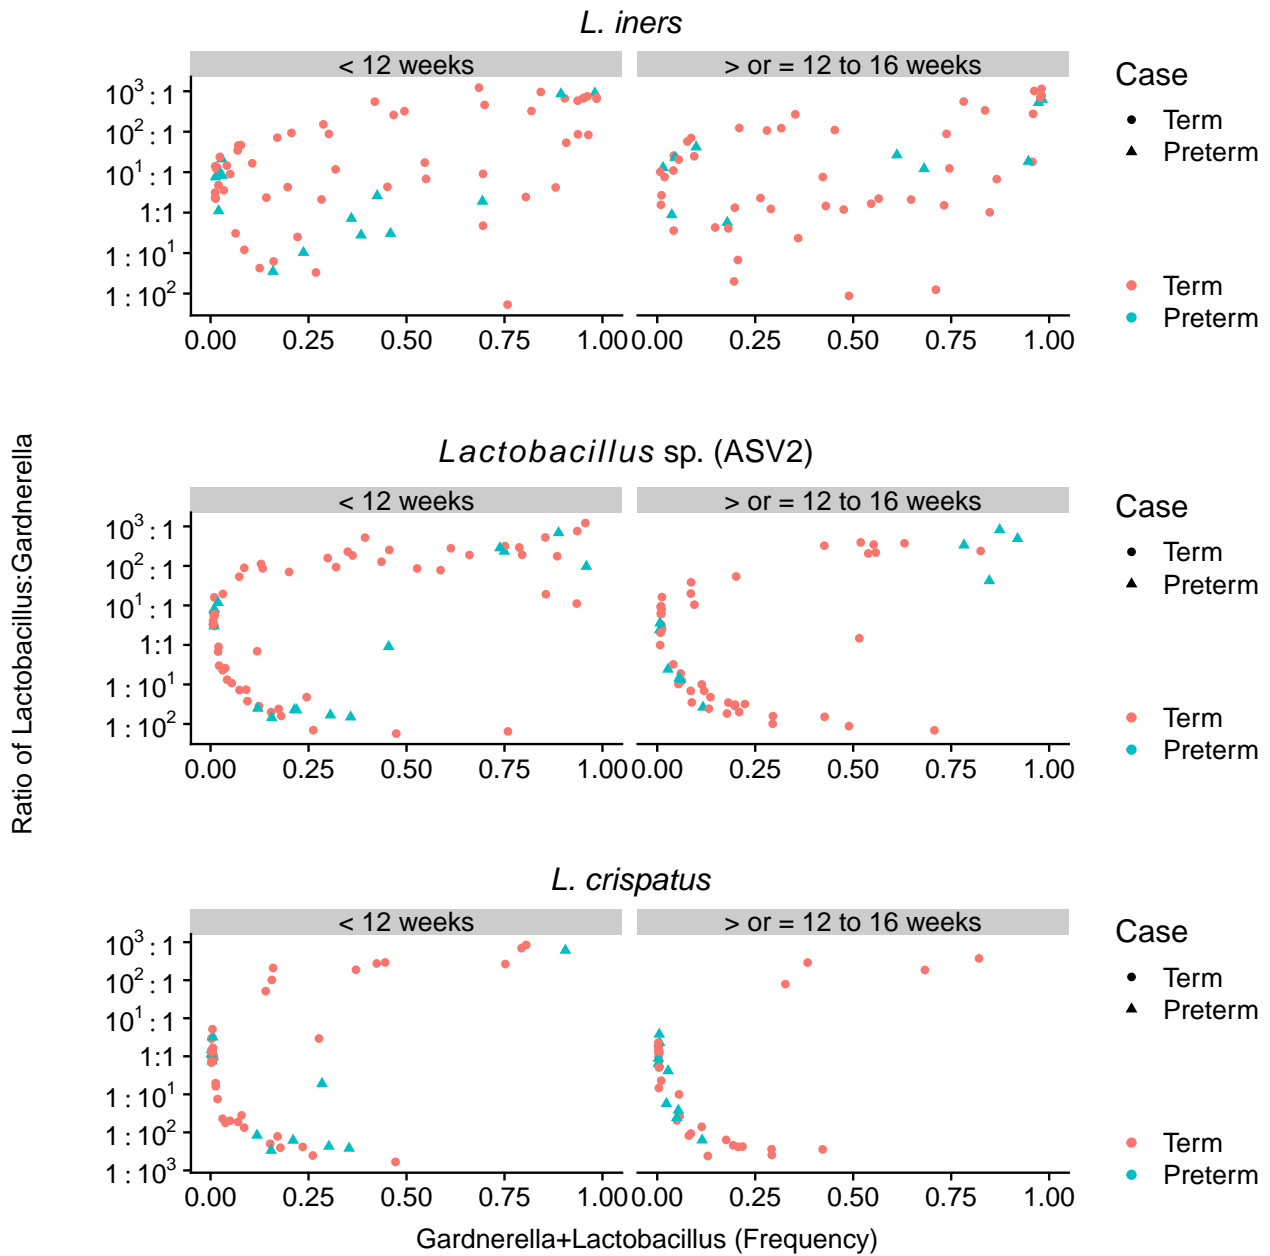

Figure 7: Exclusion of key taxa

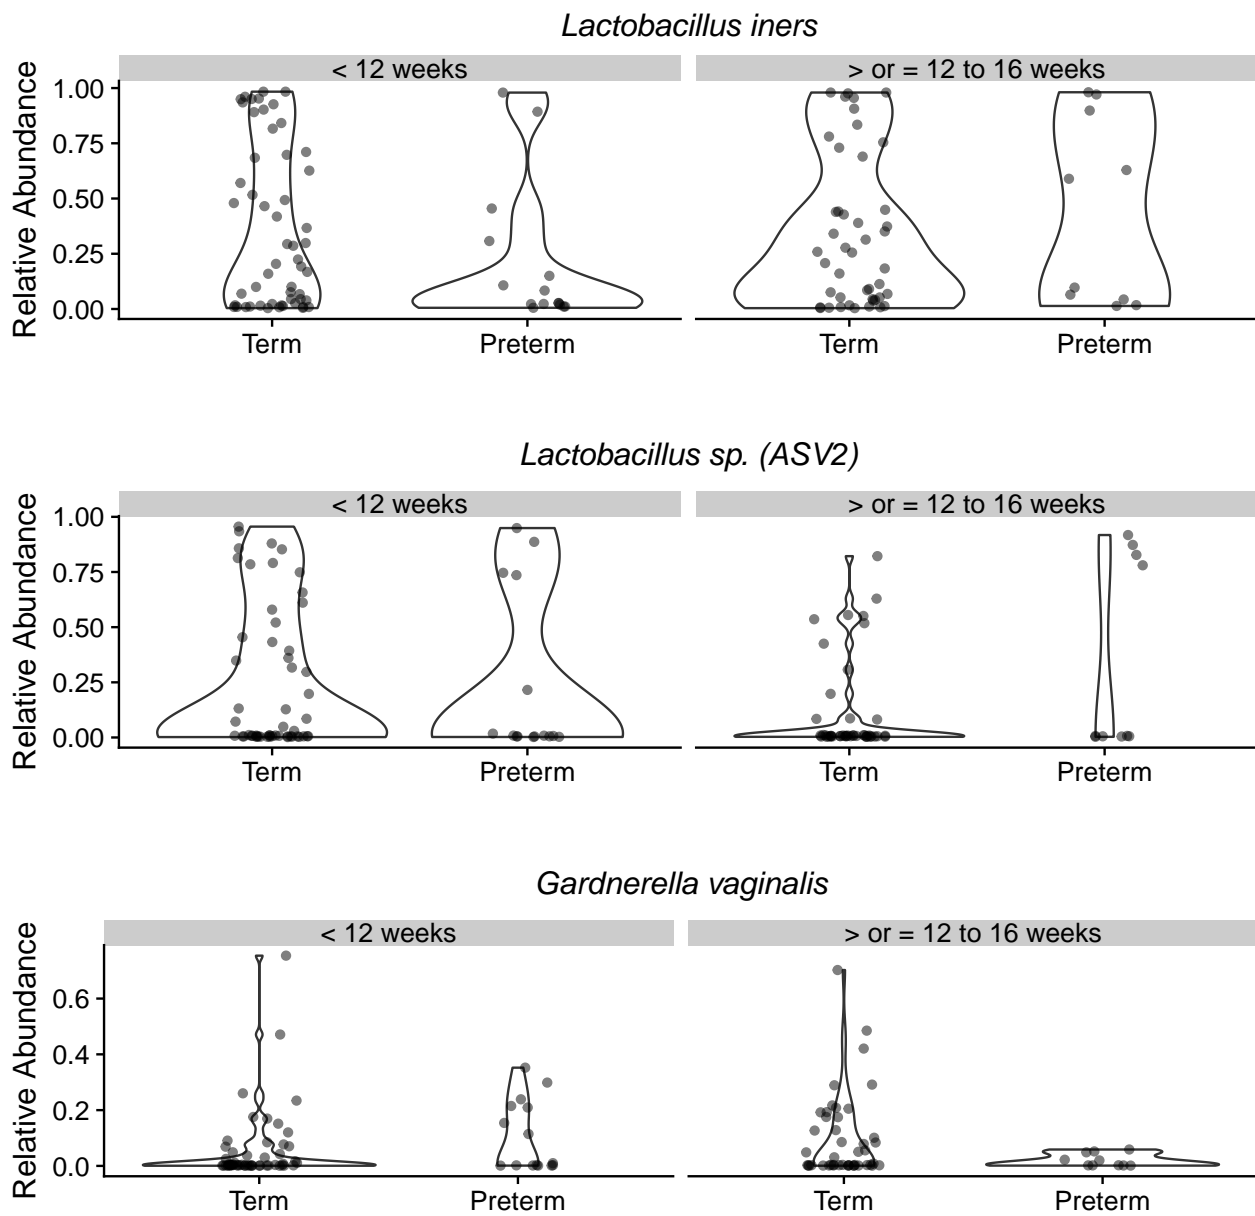

Figure 8: Aldex2 testing of individual taxa - hypothesized taxa of interest

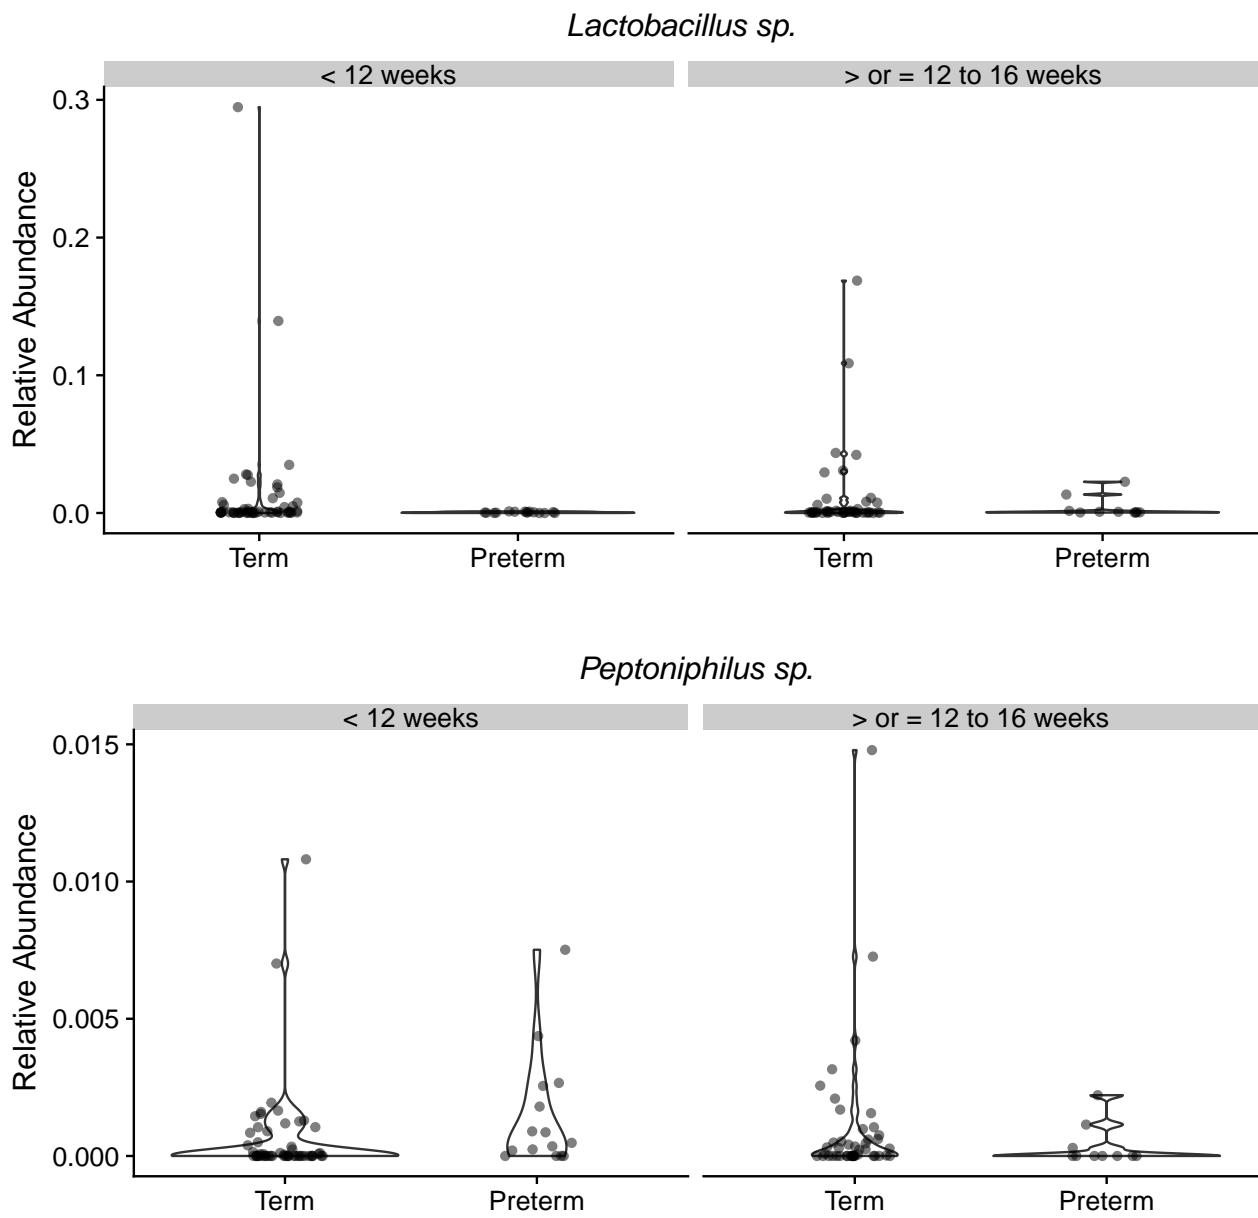

Figure 9: Aldex2 testing of individual taxa - taxa which were significant before correction for multiple testing

Table 7: Results of logistic regression for preterm birth status (odds ratios and 95 percent CI) in a sample of Peruvian women - sensitivity analysis: restricted to Mestizo women

|                                                                            | Model 1 <sup>a</sup>   | Model 2 <sup>b</sup>   |
|----------------------------------------------------------------------------|------------------------|------------------------|
|                                                                            | OR (CI) <sup>c</sup>   | OR (CI) <sup>c</sup>   |
|                                                                            | 74 controls / 21 cases | 73 controls / 21 cases |
| <i>Lactobacillus ASV2 dominated</i> <sup>d</sup> (reference = Diverse CST) | 1.01 (0.31, 3.08)      | 0.94 (0.28, 2.93)      |
| <i>L. iners dominated</i>                                                  | 0.79 (0.2, 2.7)        | 0.75 (0.19, 2.59)      |

Note:

Reference is Diverse community state type.

One individual missing parity status

<sup>a</sup> Unadjusted

<sup>b</sup> Adjusted for parity

<sup>c</sup> Profile-likelihood calculated confidence intervals

<sup>d</sup> The second CST's dominating organism - labeled ASV2 - was identified as being either *L. acidophilus* or *L. crispatus* by a BLAST search.

Table 8: Results of logistic regression for preterm birth status stratified by gestational age at vaginal swab (odds ratios and 95 percent CI) in a sample of Peruvian women - sensitivity analysis: restricted to Mestizo women

|                                                                            | < 12 weeks             |                        | > or = 12 weeks        |                        |
|----------------------------------------------------------------------------|------------------------|------------------------|------------------------|------------------------|
|                                                                            | Model 1 <sup>a</sup>   | Model 2 <sup>b</sup>   | Model 1 <sup>a</sup>   | Model 2 <sup>b</sup>   |
|                                                                            | OR (CI) <sup>c</sup>   | OR (CI) <sup>c</sup>   | OR (CI) <sup>c</sup>   | OR (CI) <sup>c</sup>   |
|                                                                            | 40 controls / 11 cases | 39 controls / 11 cases | 40 controls / 11 cases | 39 controls / 11 cases |
| <i>Lactobacillus ASV2 dominated</i> <sup>d</sup> (reference = Diverse CST) | 0.27 (0.04, 1.3)       | 0.22 (0.03, 1.13)      | 4.67 (0.82, 29.96)     | 4.65 (0.81, 29.96)     |
| <i>L. iners dominated</i>                                                  | 0.17 (0.01, 1.13)      | 0.15 (0.01, 1.02)      | 3.5 (0.53, 23.81)      | 3.48 (0.52, 23.92)     |

Note:

Reference is Diverse community state type

<sup>a</sup> Unadjusted

<sup>b</sup> Adjusted for parity, one individual missing parity information

<sup>c</sup> Profile-likelihood calculated confidence intervals

<sup>d</sup> The second CST's dominating organism - labeled ASV2 - was identified as being either *L. acidophilus* or *L. crispatus* by a BLAST search.

Table 9: Results of logistic regression for preterm birth status (odds ratios and 95 percent CI) in a sample of Peruvian women - including interaction term between bacterial community state type and gestational age at sampling and testing for effect modification on multiplicative scale

|                                                                              | Community State Type (CST)     |                                         |                                | ORs (95 percent CI) <i>Lactobacillus ASV2 dominated CST</i><br>within strata of gestational age | ORs (95 percent CI) for <i>L. iners dominated CST</i><br>within strata of gestational age |
|------------------------------------------------------------------------------|--------------------------------|-----------------------------------------|--------------------------------|-------------------------------------------------------------------------------------------------|-------------------------------------------------------------------------------------------|
|                                                                              | Diverse CST                    | <i>Lactobacillus ASV2 dominated CST</i> | <i>L. iners dominated CST</i>  |                                                                                                 |                                                                                           |
| Gestational age < 12 weeks' gestation                                        | 9/20 1.0                       | 4/19 0.49 (0.11, 1.82); p=0.30          | 2/14 0.32 (0.04, 1.47); p=0.18 | 0.46 (0.11, 1.82); p=0.30                                                                       | 0.32 (0.04, 1.47); p=0.18                                                                 |
| at vaginal swab 12 to 16 weeks' gestation                                    | 3/28 0.23 (0.05, 0.89); p=0.05 | 4/7 1.18 (0.27, 5.21); p=0.83           | 3/10 0.69 (0.15, 3.21); p=0.63 | 5.09 (0.89, 29.15); p=0.07                                                                      | 2.99 (0.5, 17.86); p=0.23                                                                 |
| Measure of interaction on multiplicative scale: Ratio of ORs (95 percent CI) |                                | 10.41 (1.21, 101.18); p=0.04            | 9.47 (0.86, 129.05); p=0.07    |                                                                                                 |                                                                                           |

Note:

ORs are adjusted for parity (nulliparous vs parous) and ethnicity (Mestizo vs not Mestizo)

All estimates presented in this table (including OR within strata of gestational age) were calculated using the regression formula  $\log(\beta) = \beta_0 + \beta_1 \text{MicrobialCST} + \beta_2 I(\text{GestationalAge} \geq 12) + \beta_3 \text{Mestizo} + \beta_4 \text{Parous} + \beta_5 \text{MicrobialCST} * I(\text{GestationalAge} \geq 12)$ .

Therefore estimates for ORs within strata of gestational age differ slightly from the ORs presented in the fully stratified analysis in Main Analysis, Table 3.

Table 10: Results of logistic regression for preterm birth status (odds ratios and 95 percent CI) in a sample of Peruvian women - including interaction term between bacterial community state type and gestational age at sampling and testing for effect modification on multiplicative and additive scales

|                                                                              | Restricted to women not in <i>L. iners dominated CST</i> |                                |  | ORs (95 percent CI) Diverse CST<br>within strata of gestational age |
|------------------------------------------------------------------------------|----------------------------------------------------------|--------------------------------|--|---------------------------------------------------------------------|
|                                                                              | Community State Type (CST)                               |                                |  |                                                                     |
|                                                                              | <i>Lactobacillus ASV2 dominated CST</i>                  | Diverse CST                    |  |                                                                     |
| Gestational age < 12 weeks' gestation                                        | 4/19 1.0                                                 | 9/20 2.08 (0.56, 8.92); p=0.29 |  | 2.08 (0.56, 8.92); p=0.29                                           |
| at vaginal swab 12 to 16 weeks' gestation                                    | 4/7 2.43 (0.45, 13.38); p=0.29                           | 3/28 0.49 (0.09, 2.57); p=0.39 |  | 0.20 (0.03, 1.15); p=0.07                                           |
| Measure of interaction on multiplicative scale: Ratio of ORs (95 percent CI) |                                                          | 0.10 (0.01, 0.83); p=0.04      |  |                                                                     |
| Measure of interaction on additive scale: RERI (95 percent CI)               |                                                          | -3.02, (-8.64, 2.6); p=0.85    |  |                                                                     |

Note:

ORs are adjusted for parity (nulliparous vs parous) and ethnicity (Mestizo vs not Mestizo)

Since measures of additive interaction can be inconsistent when using preventative factors we have recoded the reference for the CSTs, now the Diverse CST is the reference.

The models used to calculate the estimate presented in this table were run on a subsample excluding individuals assigned to the *L. iners dominated CST*



Table 11: Results of logistic regression for preterm birth status (odds ratios and 95 percent CI) in a sample of Peruvian women - including interaction term between bacterial community state type and gestational age at sampling and testing for effect modification on multiplicative and additive scales

|                                                                              |                           | <i>Restricted to women not in Lactobacillus ASV2 dominated CST</i> |                                  |                                                                         |
|------------------------------------------------------------------------------|---------------------------|--------------------------------------------------------------------|----------------------------------|-------------------------------------------------------------------------|
|                                                                              |                           | Community State Type (CST)                                         |                                  |                                                                         |
|                                                                              |                           | <i>L. iners dominated CST</i>                                      | <i>Diverse CST</i>               | <i>ORs (95 percent CI) Diverse CST within strata of gestational age</i> |
| <i>Gestational age</i>                                                       | < 12 weeks' gestation     | 2/14 1.0                                                           | 9/20 3.24, (0.68, 23.87); p=0.18 | 3.24, (0.68, 23.87); p=0.18                                             |
| <i>at vaginal swab</i>                                                       | 12 to 16 weeks' gestation | 3/10 2.32, (0.32, 20.8); p=0.41                                    | 3/28 0.69, (0.1, 4.88); p=0.71   | 0.30, (0.05, 1.85); p=0.19                                              |
| Measure of interaction on multiplicative scale: Ratio of ORs (95 percent CI) |                           |                                                                    | 0.09, (0.01, 1.05); p=0.06       |                                                                         |
| Measure of interaction on additive scale: RERI (95 percent CI)               |                           |                                                                    | -3.86, (-12.23, 4.51); p=0.82    |                                                                         |

*Note:*

ORs are adjusted for parity (nulliparous vs parous) and ethnicity (Mestizo vs not Mestizo)

Since measures of additive interaction can be inconsistent when using preventative factors we have recoded the reference for the CSTs, now the Diverse CST is the reference.

The models used to calculate the estimate presented in this table were run on a subsample excluding individuals assigned to the *Lactobacillus* ASV2 dominated CST
